# Supplementary material for: Development of a Polygenic Risk Score for BMI to Assess the Genetic Susceptibility to Obesity and Related Diseases in the Korean Population
Source: MDPI journal article supplement (doi:10.3390/ijms241411560), 2023-07-17
Supplement: s1 [file s1]

**Supplementary Table S1.** Results of association analysis between SNP and BMI adjusting for sex, age, and recruitment area using KBA dataset of 57,110 individuals from HEXA cohort. A total of 20 lead SNPs showing genome-wide significant association were selected from about 8M SNPs used for association analysis.

| CHR | SNP         | BP        | RA | MAF   | Beta  | SE    | P                      | Candidate Gene               |
|-----|-------------|-----------|----|-------|-------|-------|------------------------|------------------------------|
| 1   | rs633715    | 177852580 | C  | 0.147 | 0.207 | 0.019 | $1.40 \times 10^{-26}$ | <i>SEC16B</i>                |
| 16  | rs55872725  | 53809123  | T  | 0.166 | 0.255 | 0.025 | $9.79 \times 10^{-24}$ | <i>FTO</i>                   |
| 18  | rs476828    | 57852587  | C  | 0.205 | 0.188 | 0.019 | $3.87 \times 10^{-23}$ | <i>MC4R</i>                  |
| 11  | rs6265      | 27679916  | C  | 0.488 | 0.160 | 0.017 | $2.67 \times 10^{-21}$ | <i>BDNF-AS - BDNF</i>        |
| 19  | rs35560038  | 46175046  | A  | 0.468 | 0.130 | 0.017 | $2.55 \times 10^{-14}$ | <i>GIPR</i>                  |
| 2   | rs713586    | 25158008  | C  | 0.478 | 0.122 | 0.017 | $4.48 \times 10^{-13}$ | <i>ADCY3 - DNAJC27</i>       |
| 5   | rs261967    | 95850250  | C  | 0.465 | 0.117 | 0.017 | $4.32 \times 10^{-12}$ | <i>PCSK1 - CAST</i>          |
| 2   | rs7570198   | 648198    | T  | 0.087 | 0.200 | 0.029 | $7.41 \times 10^{-12}$ | <i>LOC105373352 - TMEM18</i> |
| 3   | rs3755804   | 52866289  | T  | 0.217 | 0.124 | 0.019 | $2.46 \times 10^{-11}$ | <i>ITIH4 - MUSTN1</i>        |
| 4   | rs10938397  | 45182527  | G  | 0.303 | 0.120 | 0.019 | $1.57 \times 10^{-10}$ | <i>PRDX4P1 - THAP12P9</i>    |
| 16  | rs13329725  | 20257273  | A  | 0.191 | 0.135 | 0.021 | $2.18 \times 10^{-10}$ | <i>SNRPEP3</i>               |
| 12  | rs11066132  | 112468206 | C  | 0.172 | 0.144 | 0.023 | $6.07 \times 10^{-10}$ | <i>NAA25</i>                 |
| 2   | rs7560575   | 54142030  | T  | 0.012 | 0.496 | 0.080 | $6.60 \times 10^{-10}$ | <i>PSME4</i>                 |
| 5   | rs112862634 | 87970352  | C  | 0.474 | 0.103 | 0.017 | $1.05 \times 10^{-9}$  | <i>LINC00461</i>             |
| 13  | rs4883723   | 54084032  | A  | 0.282 | 0.110 | 0.019 | $3.44 \times 10^{-9}$  | <i>ZNF646P1</i>              |
| 17  | rs35867081  | 79047278  | A  | 0.298 | 0.101 | 0.018 | $7.31 \times 10^{-9}$  | <i>BAIAP2</i>                |
| 20  | rs143349795 | 34559849  | A  | 0.012 | 0.309 | 0.054 | $1.19 \times 10^{-8}$  | <i>CNBD2</i>                 |
| 16  | rs2540034   | 4022694   | T  | 0.313 | 0.098 | 0.018 | $2.21 \times 10^{-8}$  | <i>ADCY9</i>                 |
| 21  | rs2211691   | 35609354  | T  | 0.485 | 0.094 | 0.017 | $2.30 \times 10^{-8}$  | <i>LINC00310</i>             |
| 6   | rs4946936   | 109003321 | C  | 0.284 | 0.111 | 0.020 | $4.00 \times 10^{-8}$  | <i>FOXO3</i>                 |

Results of association analysis are limited to SNPs with  $P$ -value  $< 5.0 \times 10^{-8}$ . The SNP ID and chromosomal position (BP) are based on NCBI genome build 37/hg19. Abbreviations are as follows: CHR, chromosome; SNP, single nucleotide polymorphism; BP, physical position (base-pair); RA, risk allele; MAF, minor allele frequency; SE, standard error.
